# Supplementary material for: Current Design of Mixed-Ligand Complexes of Magnesium(II): Synthesis, Crystal Structure, Thermal Properties and Biological Activity against Mycolicibacterium Smegmatis and Bacillus Kochii
Source: MDPI journal article supplement (doi:10.3390/cryst13091306), 2023-08-27
Supplement: s1 [file s1]

Supporting Information for the Article

# Current Design Mixed-Ligand Complexes of Magnesium(II): Synthesis, Crystal Structure, Thermal Properties and Biological Activity Against *Mycolicibacterium Smegmatis* and *Bacillus Kochii*

Marina E. Nikiforova <sup>1</sup>, Dmitriy S. Yambulatov <sup>1</sup>, Yulia V. Nelyubina <sup>2</sup>, Petr V. Primakov <sup>2</sup>, Olga B. Bekker <sup>3</sup>, Konstantin B. Majorov <sup>4</sup>, Maksim A. Shmelev <sup>1</sup>, Andrey V. Khoroshilov <sup>1</sup>, Igor L. Eremenko <sup>1,2</sup> and Irina A. Lutsenko <sup>1,\*</sup>

- <sup>1</sup> N.S. Kurnakov Institute of General and Inorganic Chemistry of the Russian Academy of Sciences, Leninsky Prosp. 31, 119991 GSP-1, Moscow, Russian Federation; yambulatov@yandex.ru (D.S.Y.)
- <sup>2</sup> A.N. Nesmeyanov Institute of Organoelement Compounds, Russian Academy of Sciences, Vavilova Str. 28, 119991 Moscow, Russian Federation; petrprimakov@gmail.com (P.V.P.)
- <sup>3</sup> N. I. Vavilov Institute of General Genetics of the Russian Academy of Sciences, Gubkina, 3, 119333 Moscow, Russian Federation; obekker@yandex.ru
- <sup>4</sup> Central Research Institute of Tuberculosis, Yauzskaya all., 2, 107564, Moscow, Russian Federation
- \* Correspondence: irinalu05@rambler.ru; Fax +7(495) 952 1279

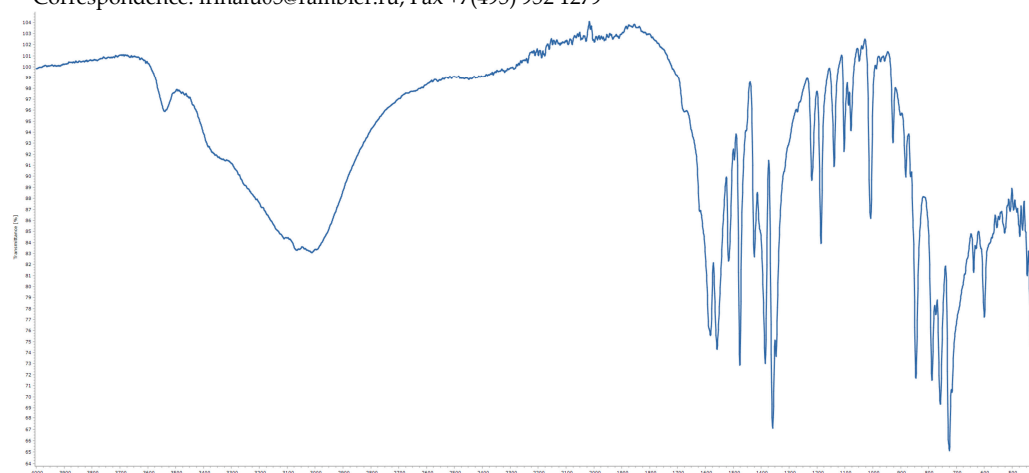

**Figure S1.** IR-spectrum of  $[\text{Mg}(\text{H}_2\text{O})_4(\text{phen})]\cdot 2\text{fur}\cdot\text{phen}\cdot\text{H}_2\text{O}$  (1)

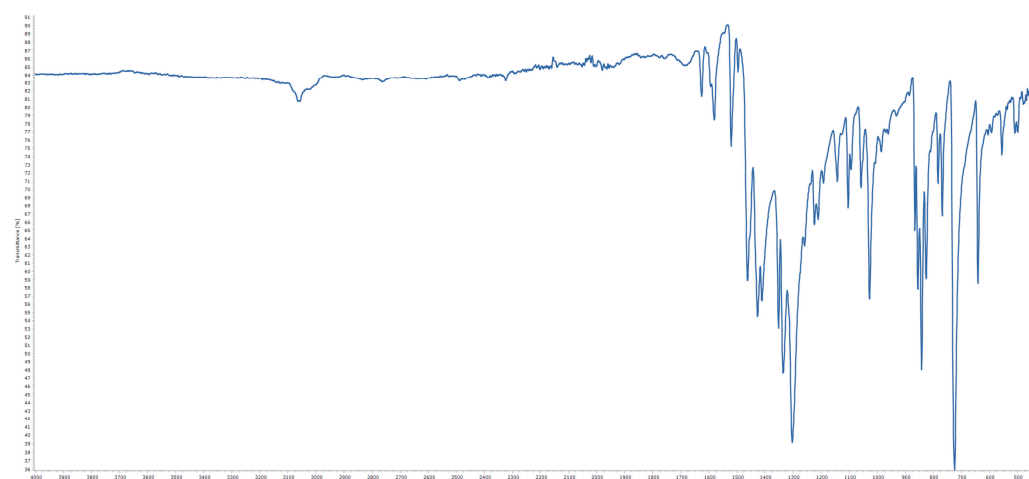

**Figure S2.** IR-spectrum of  $[\text{Mg}(\text{NO}_3)_2(\text{phen})_2]$  (2)

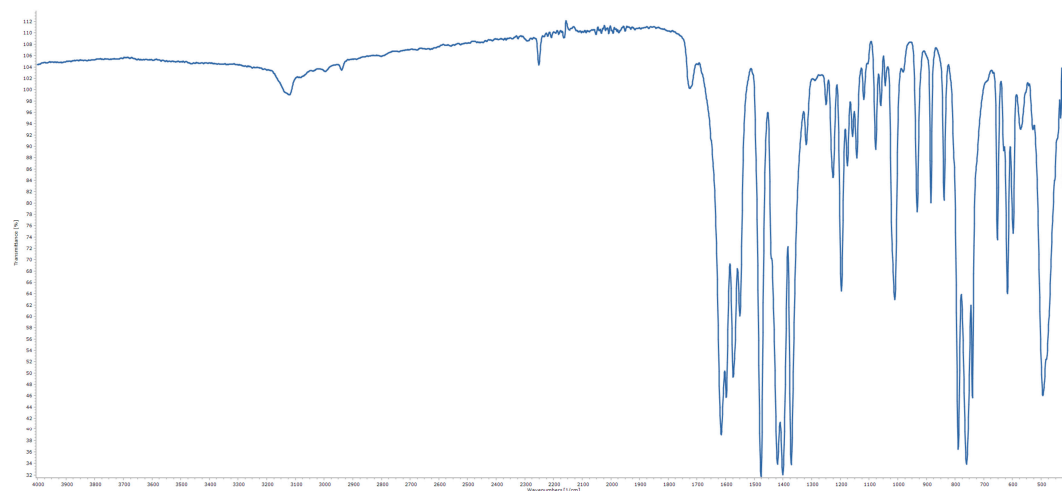

**Figure S3.** IR-spectrum of  $[\text{Mg}_3(\text{fur})_6(\text{bpy})_2] \cdot 3\text{CH}_3\text{CN}$  (**3**)

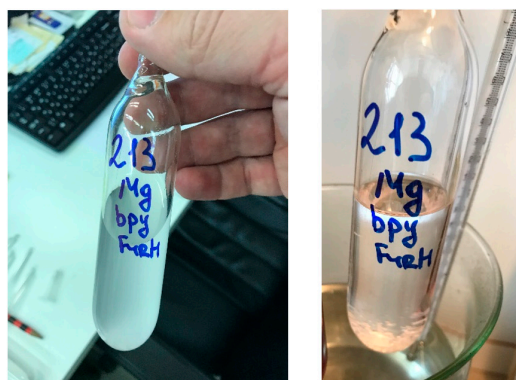

Samples of  $\text{Mg}(\text{CH}_3\text{COO})_2$  (142 mg, 1.0 mmol), HFur (224 mg, 2.0 mmol) and bpy (156 mg, 1.0 mmol) were heated with acetonitrile (10 mL) in a sealed vial by oil bath at 383 K until the solution became clear.

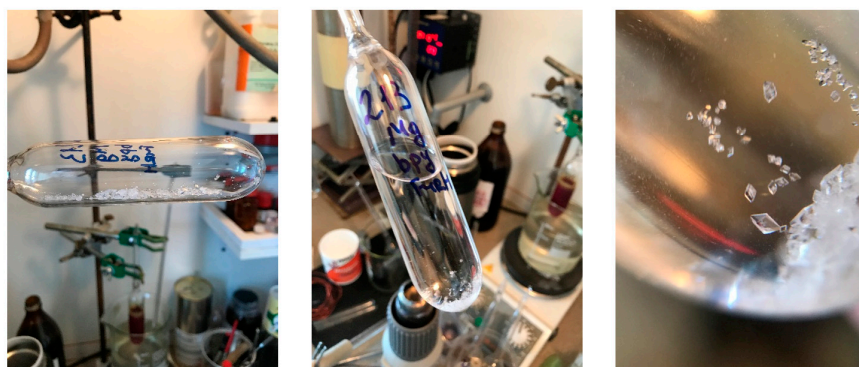

Slow cooling (10 K per hour) led to the formation of colorless rhombic-shaped single crystals amenable for X-ray diffraction.

**Figure S4.** Synthesis of  $[\text{Mg}_3(\text{fur})_6(\text{bpy})_2] \cdot 3\text{CH}_3\text{CN}$  (**3**)

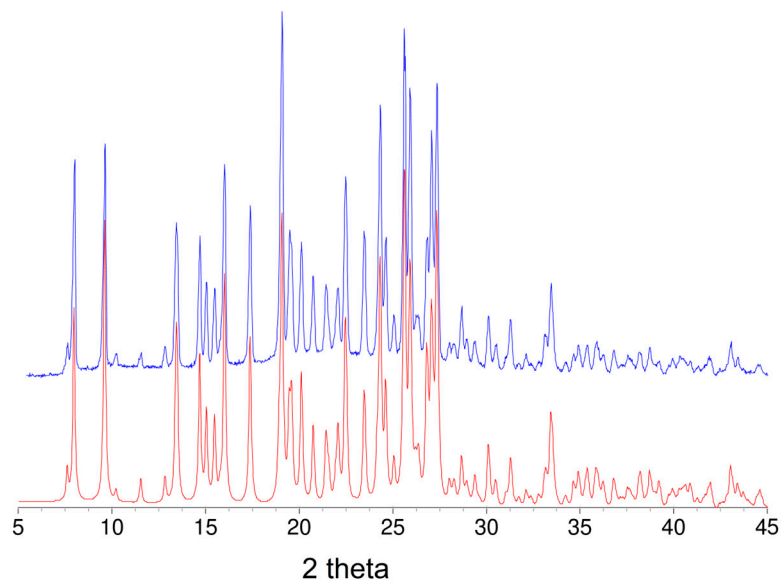

**Figure S5.** Theoretical (red) and experimental (blue) X-ray powder diffraction patterns of sample  $[\text{Mg}(\text{H}_2\text{O})_4(\text{phen})]\cdot 2\text{fur}\cdot \text{phen}\cdot \text{H}_2\text{O}$  (**1**)

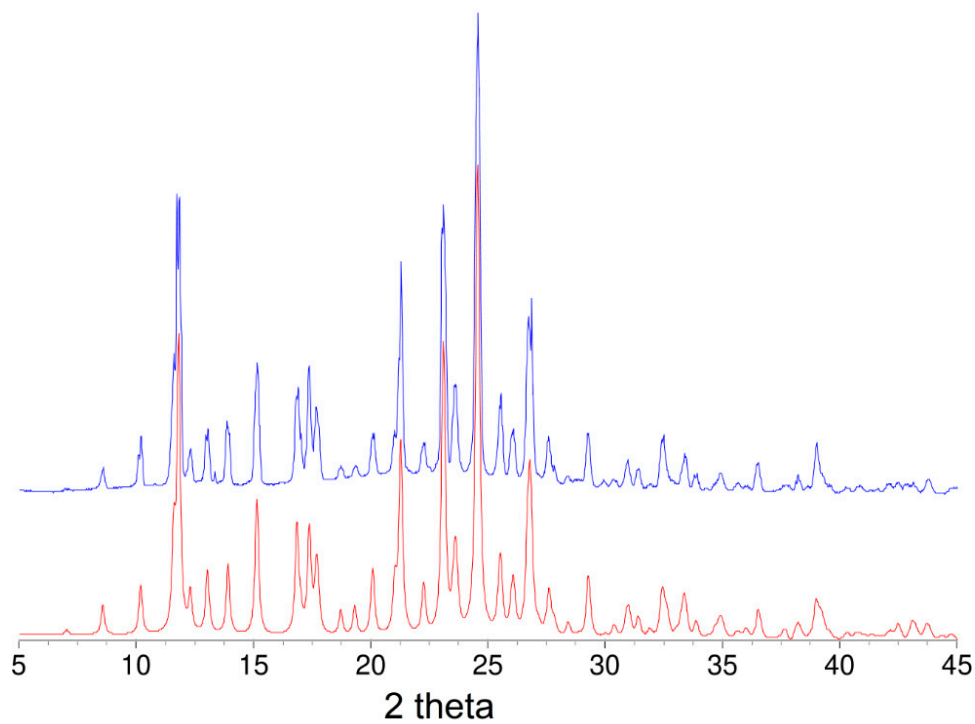

**Figure S6.** Theoretical (red) and experimental (blue) X-ray powder diffraction patterns of sample  $[\text{Mg}(\text{NO}_3)_2(\text{phen})_2]$  (**2**)

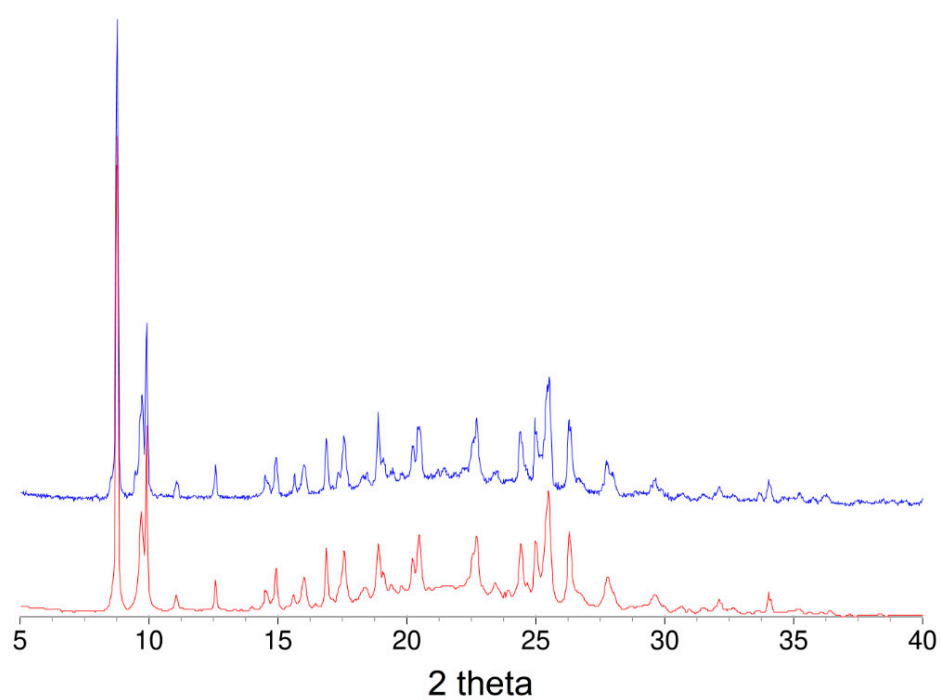

**Figure S7.** Theoretical (red) and experimental (blue) X-ray powder diffraction patterns of sample  $[\text{Mg}_3(\text{fur})_6(\text{bpy})_2] \cdot 3\text{CH}_3\text{CN}$  (3)
